# Supplementary material for: Adipocytes promote malignant growth of breast tumours with monocarboxylate transporter 2 expression via β-hydroxybutyrate
Source: PubMed Central journal article supplement (PMC5353665; doi:10.1038/ncomms14706), 2017-03-10
Supplement: ncomms14706-s1.pdf [file ncomms14706-s1.pdf]

## Supplementary information:

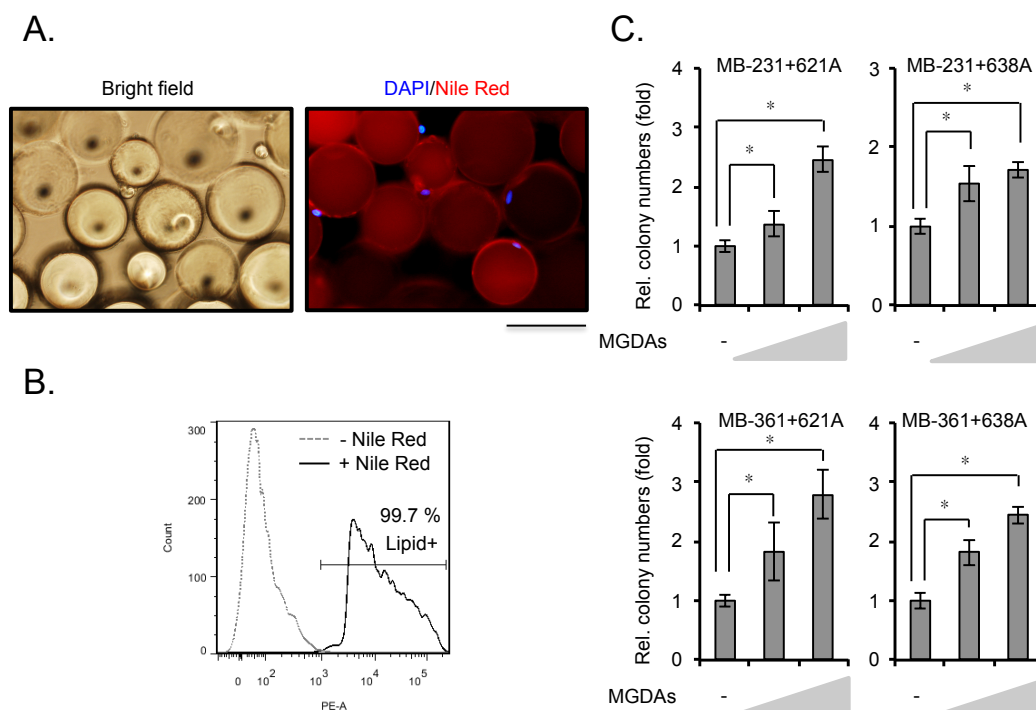

### Supplementary Figure 1. Co-culturing with primary MGDAs increases the number of breast cancer cell colonies

(A) Representative images of primary MGDAs isolated from breast cancer clinical specimens. The MGDAs were double-stained with Nile red and DAPI nuclear stain (Bar, 100  $\mu\text{m}$ ). (B) The purity of isolated MGDAs was characterized by Nile red/DAPI double staining and analyzed by FACS. (C) Soft agar colony formation assays using MDA-MB-231 and MDA-MB-361 breast cancer cells co-cultured with two different MGDAs. The experiment in C was performed in technical triplicate and repeated at least twice with similar results. Data show means  $\pm$  s.d. \*,  $p < 0.05$  (Student's t-test).

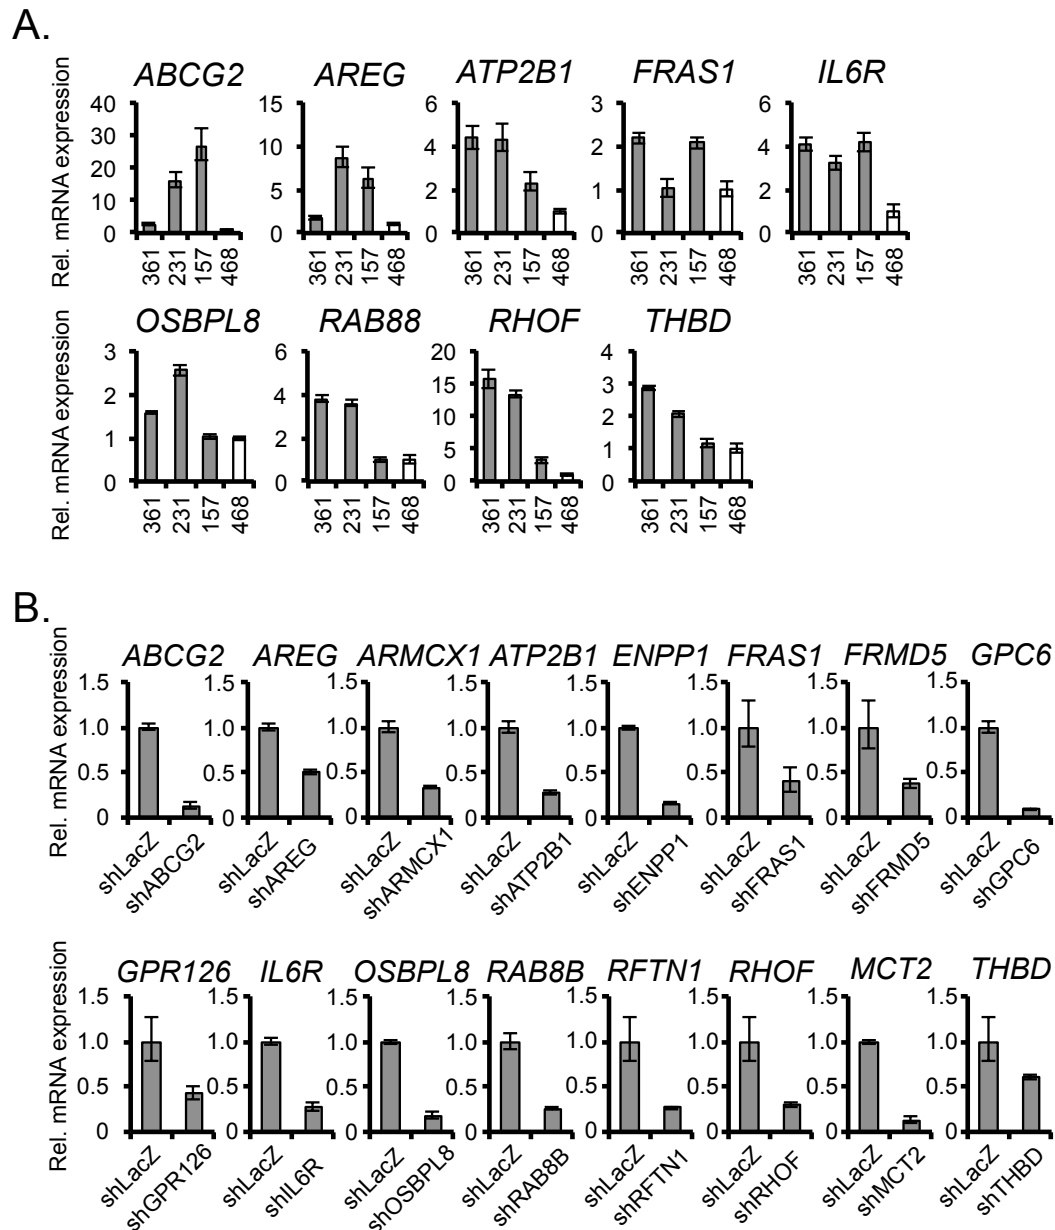

**Supplementary Figure 2. Q-PCR analyses confirm the expression levels and knockdown efficiencies of selected candidate genes from the microarray data subtractions**

(A) Expression level of each candidate gene in MDA-MB-157, MDA-MB-231, and MDA-MB-361 relative to MDA-MB-468 is indicated, see also Figure 2C. (B) RNAi knockdown efficiency for each candidate gene in MDA-MB-157 breast cancer cells was confirmed by Q-PCR analyses. The experiments in A and B were performed in technical triplicate. Data show means  $\pm$  s.d.

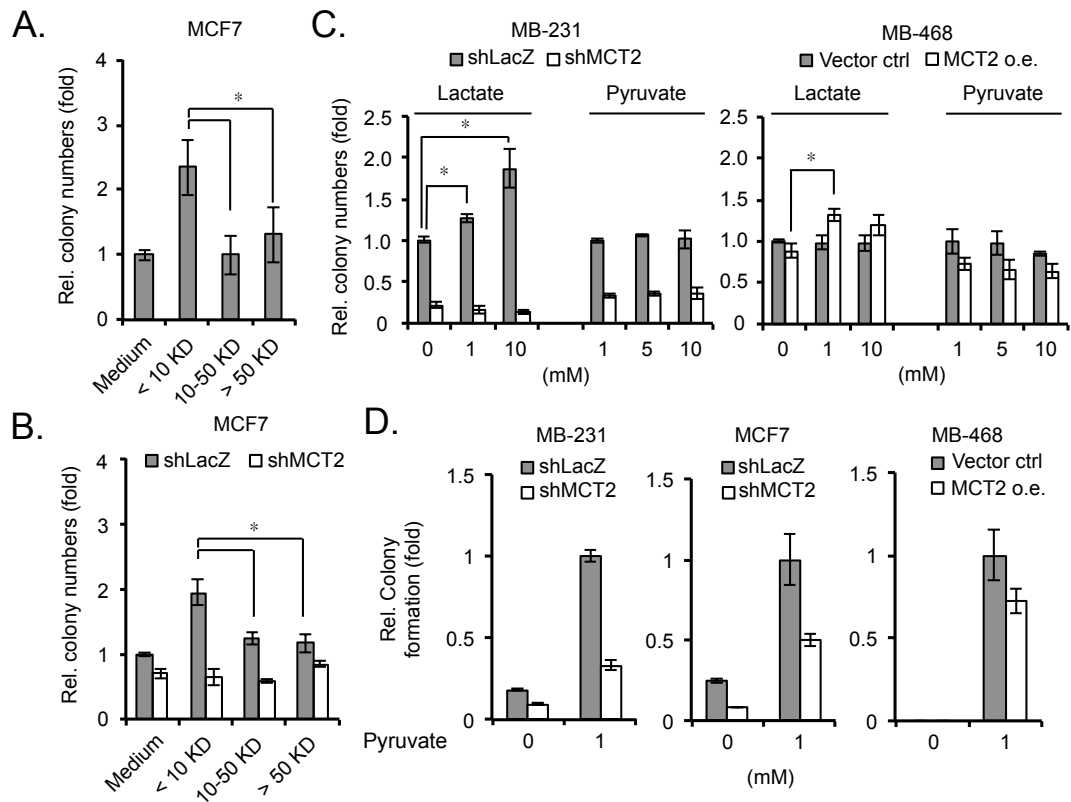

**Supplementary Figure 3. Lactate and pyruvate show partial or no effect on colony formation in MCT2-expressing breast cancer cells**

(A) Soft agar colony formation assay of MCF7 cells treated with fractionated MGDAs-conditioned medium. (B) Soft agar colony formation assay of MCT2-depleted MCF7 cells treated with fractionated MGDAs-conditioned medium. (C) MCT2-depleted MDA-MB-231 and overexpressing MDA-MB-468 cells were treated with various doses of lactate and pyruvate in soft agar colony formation assays. (D) Colony-forming ability was dramatically reduced when pyruvate was completely removed from the culture medium. The experiments in A to D were performed in technical triplicate and repeated at least twice with similar results. Data show means  $\pm$  s.d. \*,  $p < 0.05$  (Student's t-test).

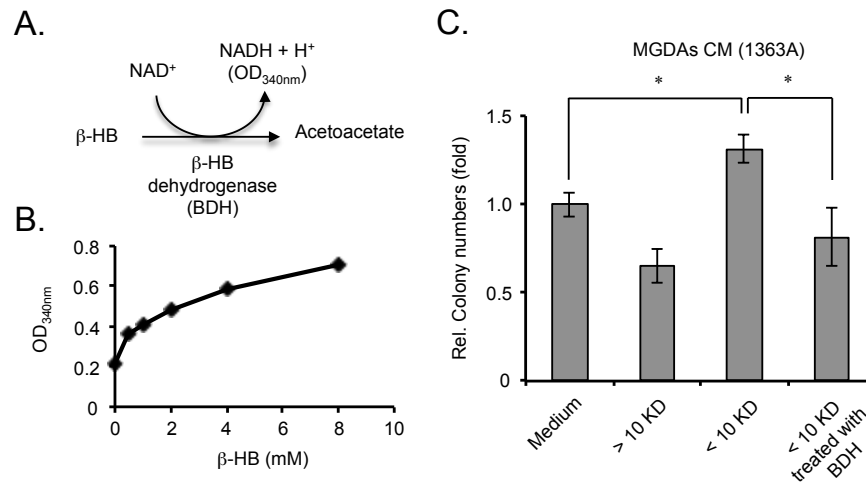

**Supplementary Figure 4. Soft agar colony formation assays using  $\beta\text{-HB}$  depleted MGDAs-conditioned medium**

(A)  $\beta\text{-HB}$  could be converted to acetoacetate by the enzyme beta-hydroxybutyrate dehydrogenase (BDH). The BDH activity could be monitored by the production of NADH at 340 nm (OD<sub>340nm</sub>). (B) The dynamic range of BDH catalyzing enzymatic reaction. 0, 0.5, 1, 2, 4, and 8 mM  $\beta\text{-HB}$  (1ml) were converted to acetoacetate by BDH (10 U/ml, 20  $\mu\text{l}$ ) in the presence of NAD<sup>+</sup> (50 mM, 20  $\mu\text{l}$ ) at 37 °C for 1h. (C) Removal of the  $\beta\text{-HB}$  in fractionated MGDAs-CM (< 10 kD) decreased the promoting activity in soft agar colony formation using MDA-MB-231 breast cancer cells. Data show means  $\pm$  s.d. \*,  $p < 0.05$  (Student's t-test).

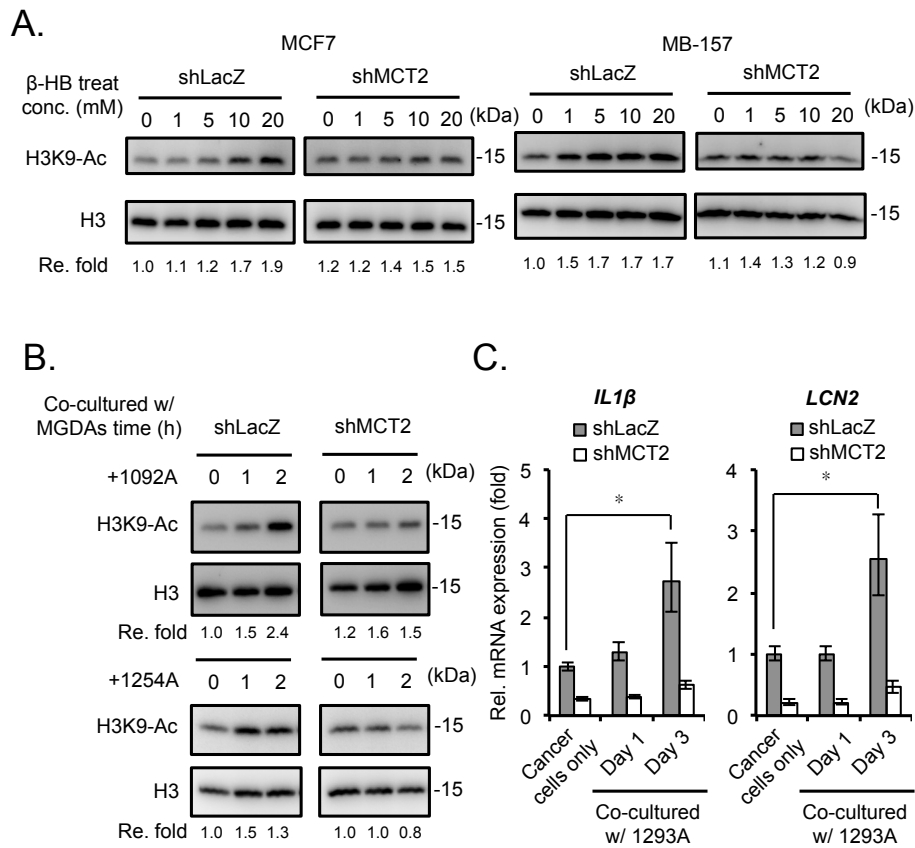

**Supplementary Figure 5. Treatment with β-hydroxybutyrate and co-culturing with MGDAs both increase H3K9 acetylation and induce expression of *IL-1β* and *LCN2* in MCT2-expressing breast cancer cells**

(A) The levels of H3K9 acetylation were increased when MCF7 and MDA-MB-157 cells were treated with β-hydroxybutyrate in the presence of MCT2. (B) Co-culture with MGDAs increased the histone H3 Lys 9 (H3K9) acetylation in MCT2-expressing cells. (C) The expression levels of *IL-1β* and *LCN2* were induced upon MGDAs co-culture. The experiment in C was performed in technical triplicate and repeated at least twice with similar results. Data show means ± s.d. \*,  $p < 0.05$  (Student's t-test).

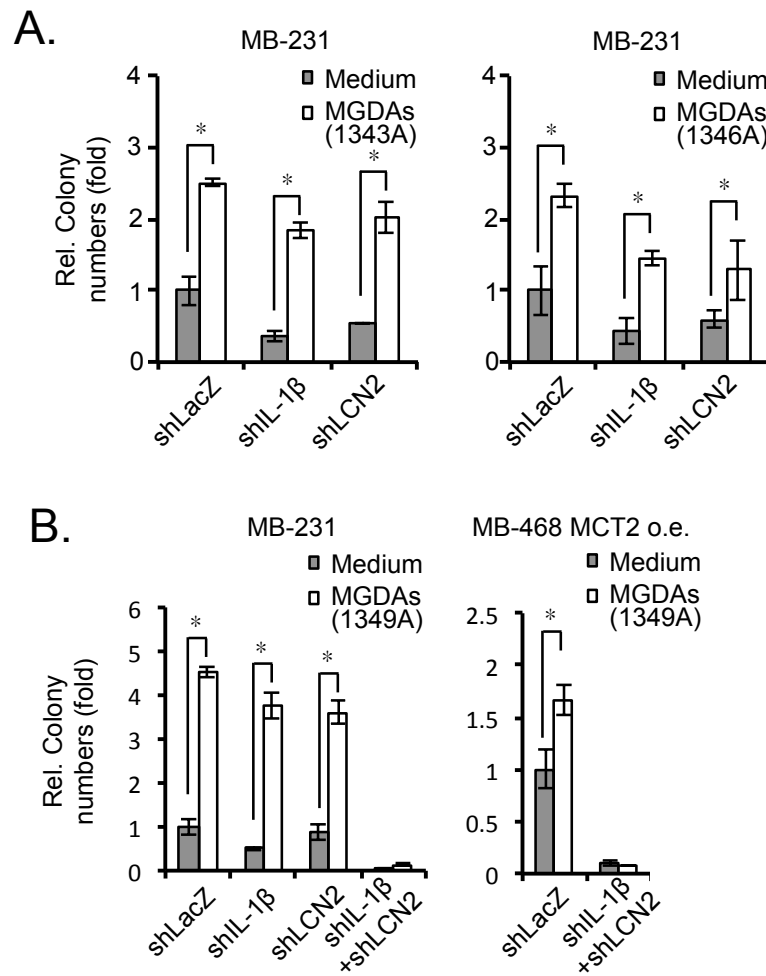

**Supplementary Figure 6. Concurrent depletion of *IL-1 $\beta$*  and *LCN2* abolishes MGDAs-mediated colony promotion**

(A) Depletion of *IL-1 $\beta$*  and *LCN2* alone only slightly abrogated the colony promotion mediated by MGDAs co-culture. (B) Double knockdown of *IL-1 $\beta$*  and *LCN2* completely abrogated the increase of colonies induced by MGDAs co-culture in MDA-MB-231 and MDA-MB-468 MCT2-overexpressing cells. The experiments in A and B were performed in technical triplicate and repeated at least twice with similar results. Data show means  $\pm$  s.d. \*,  $p < 0.05$  (Student's t-test).

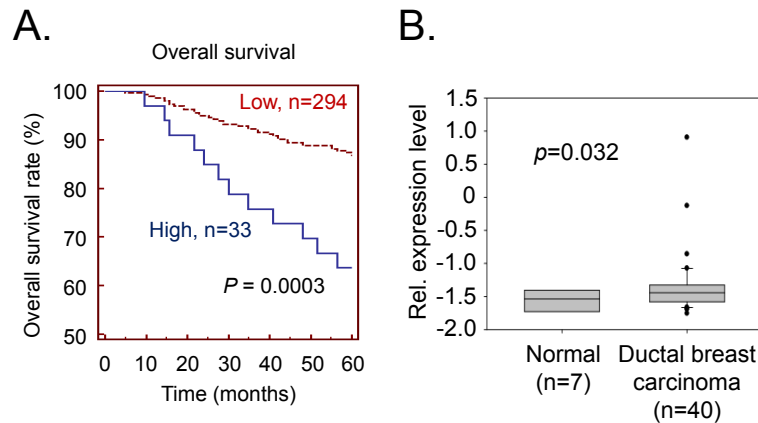

**Supplementary Figure 7. The expression of *MCT2* correlates with poor prognosis and is upregulated in ductal carcinoma**

The expression of *MCT2* was associated with poor prognosis (A) and higher in breast cancer tissues compared to normal tissues (B). (Data was adapted from the breast tumor gene expression profiling done by Kao *et al*, BMC Cancer, 2011, 11 (143) and Richardson *et al*, Cancer cell, 2006, 9(2): 121-132, respectively, <http://www.oncomine.org>)

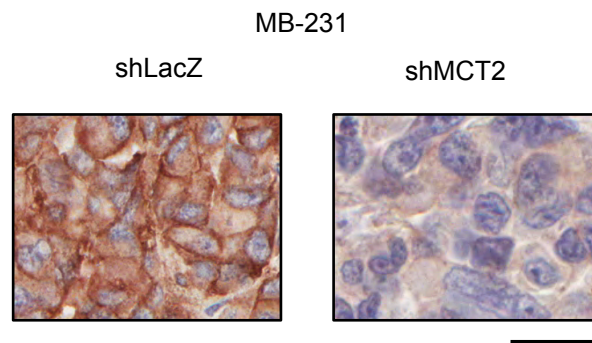

**Supplementary Figure 8. Immunohistochemistry staining of MCT2 in MDA-MB-231 shLacZ and shMCT2 xenograft tumors**



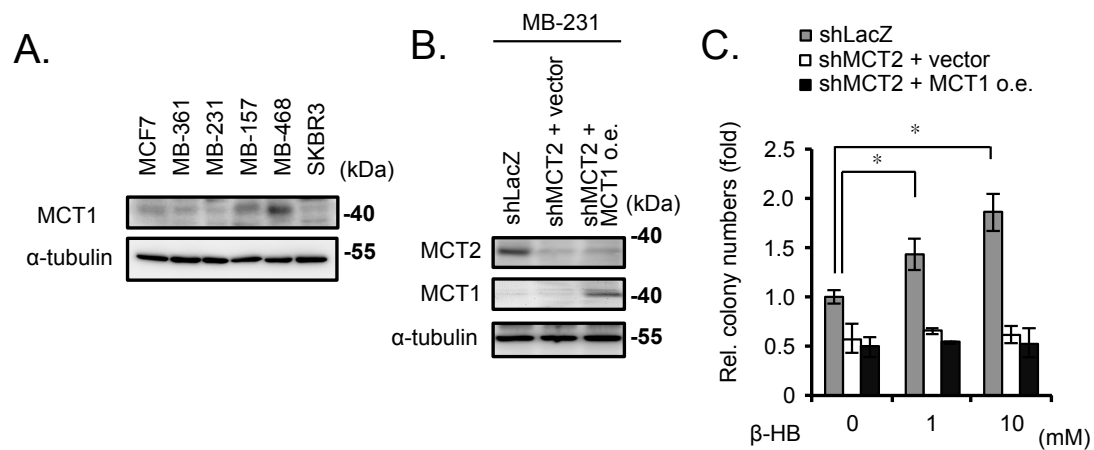

**Supplementary Figure 9. Ectopic expression of MCT1 fails to rescue the response to  $\beta$ -hydroxybutyrate supplement in MCT2-depleted MDA-MB-231 cells**

(A) Western blot analysis of MCT1 in six different breast cancer cell lines. (B) Overexpression of MCT1 in MCT2-depleted MDA-MB-231 cells. (C) Ectopic expression of MCT1 in MCT2-depleted MDA-MB-231 cells did not rescue the response to  $\beta$ -hydroxybutyrate treatment in soft agar colony formation assays. The experiment in C was performed in triplicate and repeated at least twice with similar results. Data show means  $\pm$  s.d. \*,  $p < 0.05$  (Student's t-test).

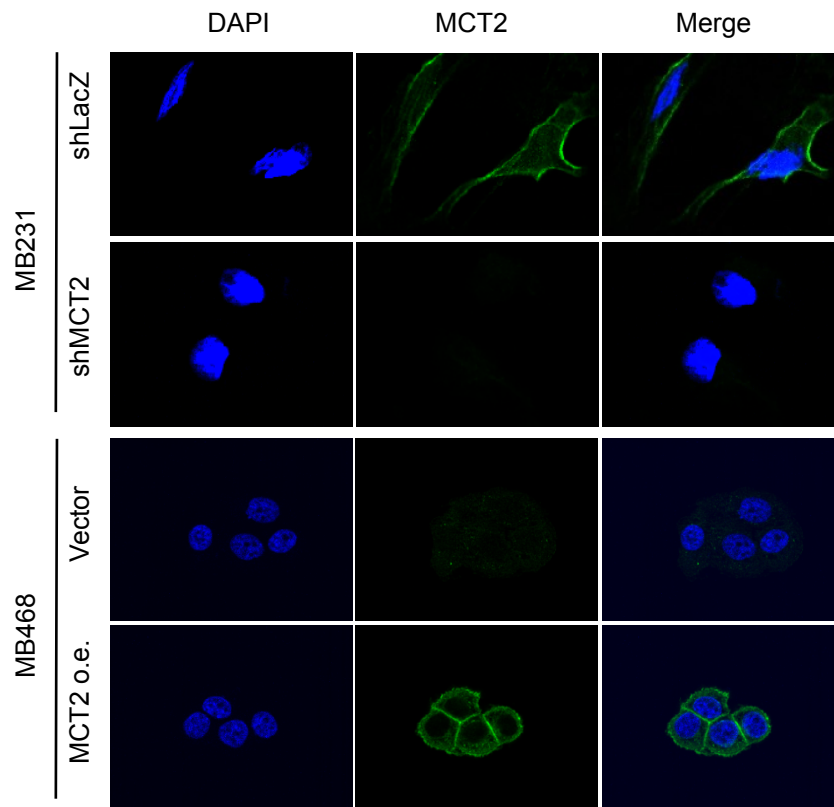

**Supplementary Figure 10. Immunofluorescence staining of MCT2 in breast cancer cells**

The intracellular location of MCT2 was determined by IF staining in MDA-MB-231 (Upper panel, shLacZ vs. shMCT2) and MDA-MB-468 breast cancer cells (Lower panel, vector control vs. MCT2 o.e.). Bar, 10  $\mu$ m

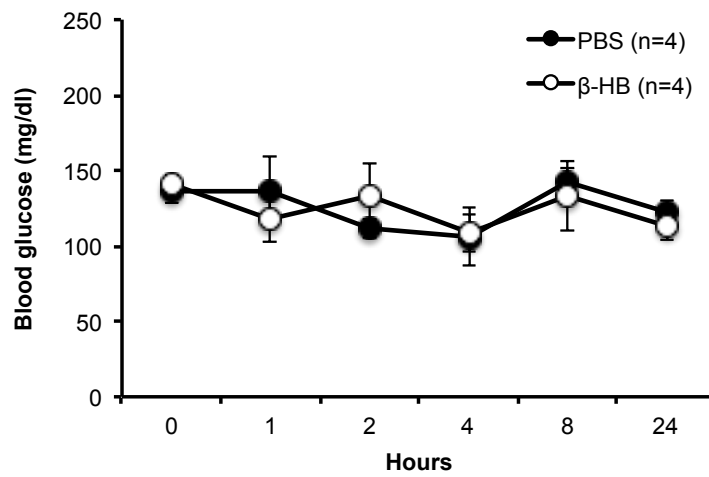

**Supplementary Figure 11. Blood glucose levels after intraperitoneal administration of  $\beta$ -hydroxybutyrate in mice**

Blood glucose levels were determined at the indicated time following the administration of  $\beta$ -hydroxybutyrate (500 mg/kg/). (PBS group, n=4;  $\beta$ -HB group n=4). Data show means  $\pm$  s.d.

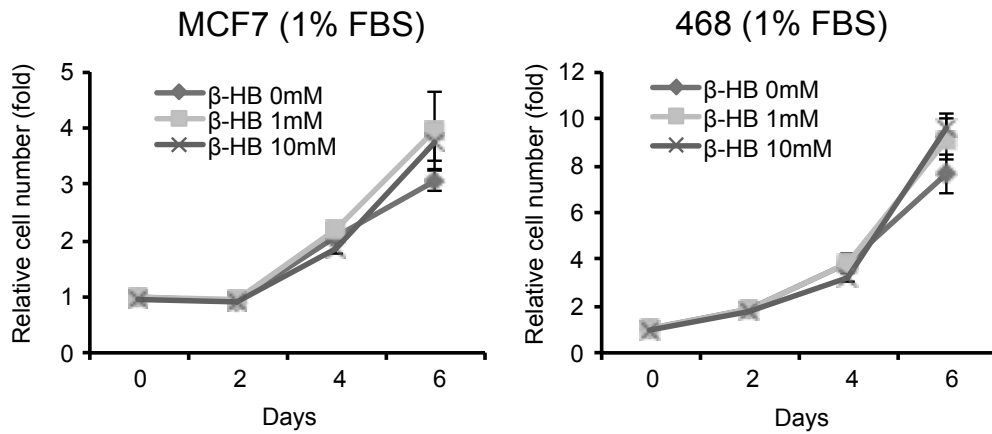

**Supplementary Figure 12. Proliferation of breast cancer cells was not influenced upon  $\beta$ -hydroxybutyrate treatment**

The relative proliferation rate of MCF7 and MDA-MB-468 cells were determined by MTT assay upon different dosages of  $\beta$ -hydroxybutyrate treatment. Data show means  $\pm$  s.d.

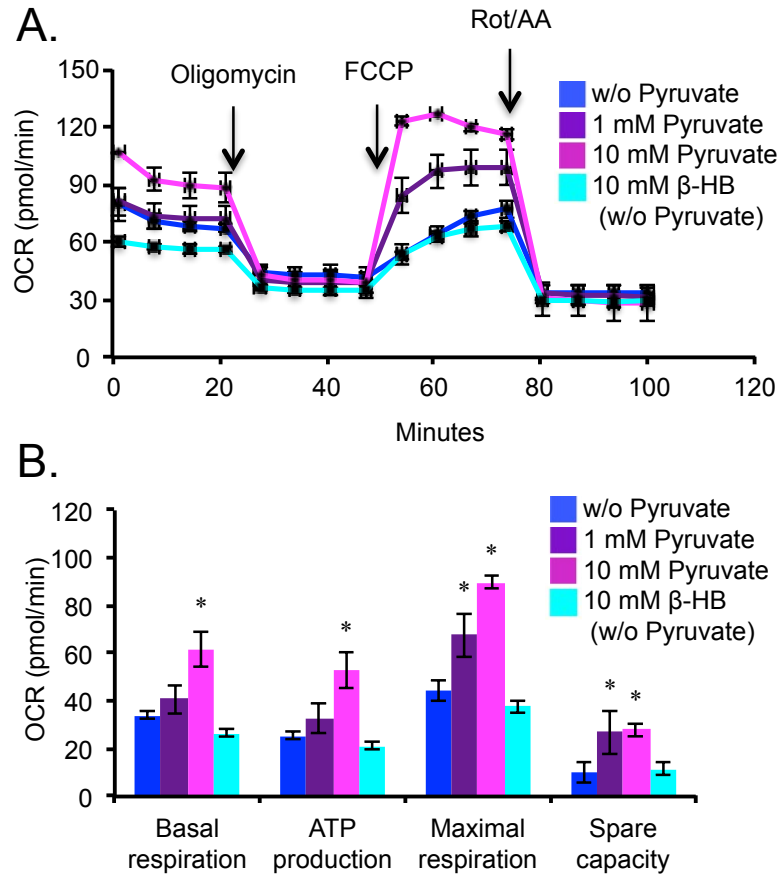

**Supplementary Figure 13.  $\beta$ -hydroxybutyrate would not be a preferential mitochondrial fuel in breast cancer cells**

(A) Raw data of oxygen consumption rate (OCR) determined by the Seahorse XFe96 analyzer. MDA-MB-231 cells were seeded in pyruvate free condition. Different concentrations of pyruvate and/or  $\beta$ -hydroxybutyrate were added and then incubated for 1 hr before Seahorse measurement. (B) Analysis of the Seahorse data. Pyruvate, but not  $\beta$ -hydroxybutyrate efficiently increased basal respiration, ATP production, maximal respiration, and spare capacity of MDA-MB-231 cells. The experiment was performed in technical triplicate. Data show means  $\pm$  s.d. \*,  $p < 0.05$  (Student's t-test).

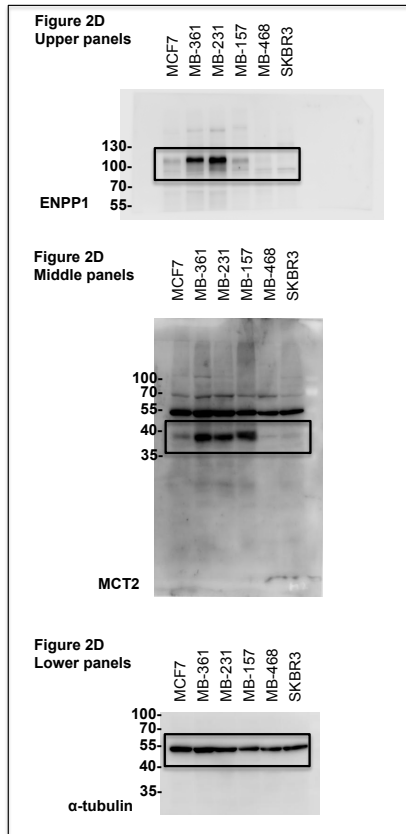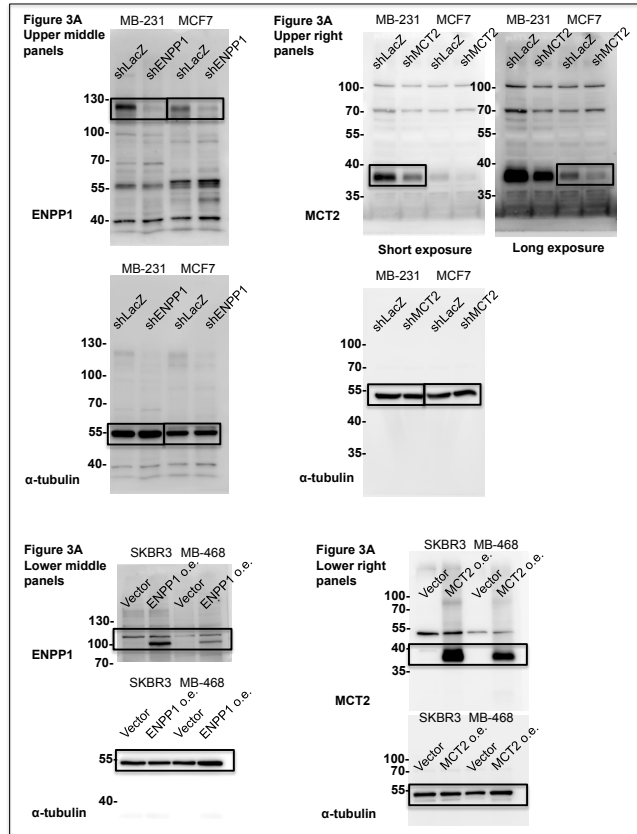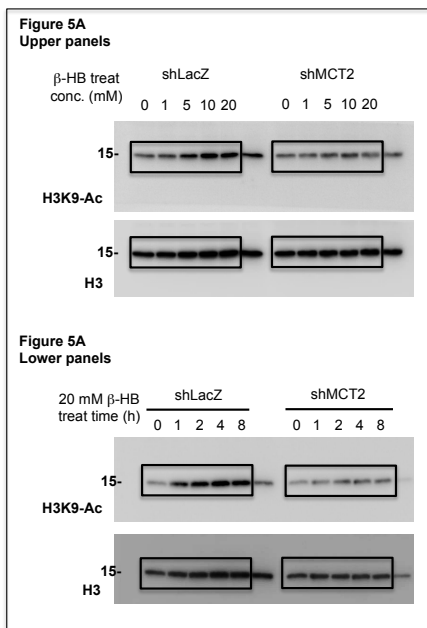

**Supplementary Figure 14. Uncropped scans of immuno-blots shown in the main figures**

Boxes indicate the cropped areas used in the figure.

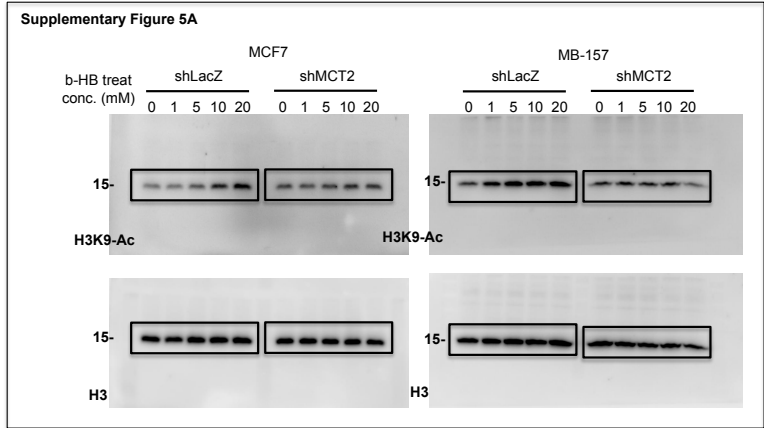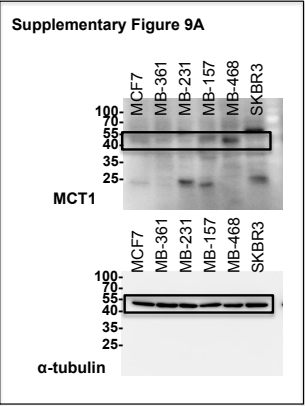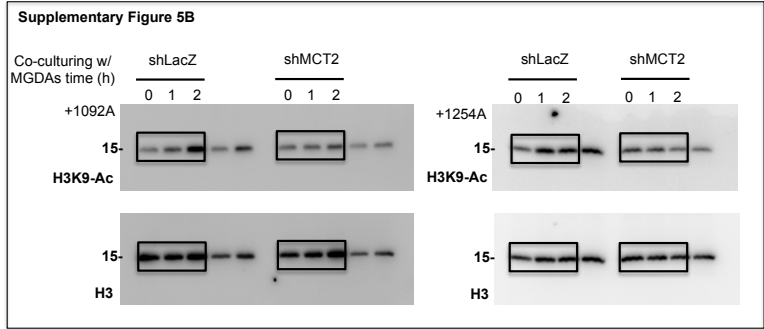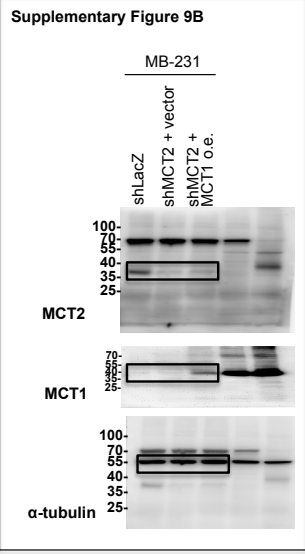

**Supplementary Figure 15. Uncropped scans of immuno-blots shown in the supplementary figures**  
 Boxes indicate the cropped areas used in the figure.

**Supplementary Table 1. Characteristics of patients and tumors in this study (cohort 1, Q-PCR)**

| Factors                  | No of patients (%)<br>n = 106 |
|--------------------------|-------------------------------|
| <b>Age (years old)</b>   |                               |
| ≤ 50                     | 59 (55.7 %)                   |
| > 50                     | 47 (44.3 %)                   |
| <b>Tumor size (cm)</b>   |                               |
| ≤ 2                      | 23 (21.7 %)                   |
| > 2                      | 82 (77.4 %)                   |
| unknown                  | 1 (0.9 %)                     |
| <b>Lymph node status</b> |                               |
| 0                        | 29 (27.4 %)                   |
| 1-3                      | 34 (32.1 %)                   |
| ≥ 4                      | 36 (33.9 %)                   |
| unknown                  | 7 (6.6 %)                     |
| <b>Grade</b>             |                               |
| 1                        | 28 (26.4 %)                   |
| 2                        | 53 (50.0 %)                   |
| 3                        | 13 (12.3 %)                   |
| unknown                  | 12 (11.3 %)                   |
| <b>Stage</b>             |                               |
| 0 & I                    | 14 (13.2 %)                   |
| II                       | 67 (63.2 %)                   |
| III                      | 18 (17.0 %)                   |
| IV                       | 4 (3.8 %)                     |
| unknown                  | 3 (2.8 %)                     |
| <b>ER</b>                |                               |
| (+)                      | 68 (64.2 %)                   |
| (-)                      | 35 (33.0 %)                   |
| unknown                  | 3 (2.8 %)                     |
| <b>PR</b>                |                               |
| (+)                      | 54 (50.9 %)                   |
| (-)                      | 49 (46.3%)                    |
| unknown                  | 3 (2.8 %)                     |



**Supplementary Table 2. Characteristics of patients and tumors in this study (cohort 2, IHC)**

| Factors                | No of patients (%)<br>n = 36 |
|------------------------|------------------------------|
| <b>Age (years old)</b> |                              |
| ≤ 50                   | 10 (27.8 %)                  |
| > 50                   | 26 (72.2 %)                  |
| <b>Grade</b>           |                              |
| 1                      | 3 (8.3 %)                    |
| 2                      | 19 (52.8 %)                  |
| 3                      | 14 (38.9 %)                  |
| <b>TNM Stage</b>       |                              |
| 0 & I                  | 4 (11.1 %)                   |
| II                     | 22 (61.1 %)                  |
| III                    | 10 (27.8 %)                  |
| IV                     | 0 (0 %)                      |
| <b>ER</b>              |                              |
| (+)                    | 27 (75 %)                    |
| (-)                    | 9 (25 %)                     |
| <b>PR</b>              |                              |
| (+)                    | 18 (50 %)                    |
| (-)                    | 18 (50 %)                    |
| <b>HER2</b>            |                              |
| (+)                    | 8 (22.2 %)                   |
| (-)                    | 28 (78.8 %)                  |

**Supplementary Table 3. Characteristics of patients and tumors**

(Data was adapted from the breast tumor gene expression profiling by Kao *et al*, BMC Cancer, 2011, 11 (143), <http://www.oncomine.org>)

| Factors         | No of patients (%)<br>n = 327 |
|-----------------|-------------------------------|
| Age (years old) |                               |
| ≤ 50            | 209 (63.9 %)                  |
| > 50            | 118 (36.1 %)                  |
| T status        |                               |
| T1              | 99 (30.3 %)                   |
| T2              | 188 (57.5 %)                  |
| T3              | 26 (7.9 %)                    |
| T4              | 12 (3.7 %)                    |
| unknown         | 2 (0.6 %)                     |
| N status        |                               |
| N0              | 137 (41.9 %)                  |
| N1              | 87 (26.6 %)                   |
| N2              | 63 (19.3 %)                   |
| N3              | 40 (12.2 %)                   |
| M status        |                               |
| M0              | 319 (97.6 %)                  |
| M1              | 8 (2.4 %)                     |
| TNM stage       |                               |
| I               | 67 (20.5 %)                   |
| II              | 147 (45.0 %)                  |
| III             | 103 (31.5 %)                  |
| IV              | 8 (2.4 %)                     |
| unknown         | 2 (0.6 %)                     |
| ER              |                               |
| (+)             | 204 (62.4 %)                  |
| (-)             | 123 (37.6 %)                  |
| HER2            |                               |
| (+)             | 75 (22.9 %)                   |
| (-)             | 252 (77.1%)                   |

**Supplementary Table 4. Univariate and multivariate proportional hazards analysis of the influence of MCT2 expression on the overall survival of 327 breast cancer patients**

(Data was adapted from the breast tumor gene expression profiling by Kao *et al*, BMC Cancer, 2011, 11 (143), <http://www.oncomine.org>)

| Variables                                 | Univariate<br>HR (95% CI) | <i>P</i>          | Multivariate<br>HR (95% CI) | <i>P</i>      |
|-------------------------------------------|---------------------------|-------------------|-----------------------------|---------------|
| MCT2 high-risk group (vs. low-risk group) | 3.13 (1.64-5.97)          | <b>0.0005</b>     | 2.03 (1.01-4.08)            | <b>0.049</b>  |
| Age ( $\geq$ 46 years old) <sup>a</sup>   | 0.84 (0.49-1.45)          | 0.5363            | 1.06 (0.60-1.87)            | 0.8510        |
| ER (vs negative group)                    | 0.38 (0.22-0.67)          | <b>0.0007</b>     | 0.51 (0.26-1.02)            | 0.0581        |
| HER2 (vs negative group)                  | 2.35 (1.35-4.12)          | <b>0.0028</b>     | 1.42 (0.74-2.70)            | 0.2865        |
| T status (per grade) <sup>b</sup>         | 2.04 (1.49-2.80)          | <b>&lt;0.0001</b> | 1.48 (0.95-2.32)            | 0.0842        |
| N status (per grade) <sup>c</sup>         | 1.92 (1.50-2.46)          | <b>&lt;0.0001</b> | 1.62 (1.22-2.14)            | <b>0.0008</b> |
| M status (per grade) <sup>d</sup>         | 4.52 (1.63-12.50)         | <b>0.0038</b>     | 1.92 (0.52-7.09)            | 0.3321        |

<sup>a</sup>Median age = 46 years old; <sup>b</sup>T status, T1-T4; <sup>c</sup>N status, N0-N3; <sup>d</sup>M status, M0-M1  
HR: hazard ratio, CI: confidence interval

**Supplementary Table 5. Primer sequences for cloning**

| Gene          |         | Sequence (5'-3')                   |
|---------------|---------|------------------------------------|
| <i>ARMCX1</i> | forward | GATCACTAGTATGGGCCGCACTCGGGAA       |
|               | reverse | GATCGCGGCCGCTTAGAGTTTGGTTAATACTTTC |
| <i>ENPP1</i>  | forward | GATCCTCGAGATGGAGCGCGACGGCTGC       |
|               | reverse | GATCTCTAGATCAGTCTTCTTGGCTAAAGGT    |
| <i>MCT2</i>   | forward | GATCCTCGAGATGCCACCAATGCCAAGT       |
|               | reverse | GATCTCTAGATTAATGTTAGTTTCTCTTTC     |

**Supplementary Table 6. Target sequences of shRNA**

| Gene          | Clone ID   | Target sequence (5'-3') |
|---------------|------------|-------------------------|
| <i>ABCG2</i>  | TRCN59798  | GCCTCGATATTCCATCTTCAA   |
|               | TRCN59799  | GCAACAACATGACGAATCAT    |
|               | TRCN59800  | CCTTCTTCGTTATGATGTTTA   |
|               | TRCN59801  | GCTGTGGCATTAAACAGAGAA   |
|               | TRCN59802  | CCTGCCAATTTCAAATGTAAT   |
| <i>AREG</i>   | TRCN117993 | GCCGACTATGACTACTCAGAA   |
|               | TRCN117995 | GAACGAAAGAACTTCGACAA    |
|               | TRCN117996 | GAACCACAAATACCTGGCTAT   |
| <i>ARMCX1</i> | TRCN133686 | GCTAAGACTGTTAACCAACAT   |
|               | TRCN138265 | CTTGGTCACTCTGGGTAACAA   |
|               | TRCN160564 | CTTCTTAATATCCTTACCCTA   |
|               | TRCN160630 | CACTTCACCAAGATACAGATT   |
|               | TRCN160631 | CAGAATTGATTTCCCTCTTTA   |
|               | TRCN161844 | GCAGTTGGTACGATGTGATTT   |
| <i>ATP2B1</i> | TRCN43068  | GCCTACAATTTACCTTGTTAA   |
|               | TRCN43069  | CCAGAGAAAGAGGGTGGATTA   |
|               | TRCN43070  | GCCTCTCATCTCACGTACAAT   |
|               | TRCN43071  | GCAGATTTAGAAAGAAGAGAA   |
| <i>ENPP1</i>  | TRCN2537   | CGTGCATAGAACCAGAACATA   |
|               | TRCN2540   | CTGCGAAAGTATGCTGAAGAA   |
| <i>FRAS1</i>  | TRCN73564  | CCCTCACATCTCTCTTACCAA   |
|               | TRCN73566  | GTGCCAAATGTCTGTGTAGAA   |
|               | TRCN73567  | CGTTGGCGGAATTTGCAGTAT   |
| <i>FRMD5</i>  | TRCN128657 | CATCTTTCCAATTTGCAGGAT   |
|               | TRCN131096 | GAGGAGGAGAAGGAATCTGAA   |
| <i>GPC6</i>   | TRCN123094 | GCTTCCTCTTTCCTTCAGCTA   |
|               | TRCN123095 | GCCATTATGAACATGCAAGAA   |
|               | TRCN123096 | GCCAACAAAGCAAACCTCGAAT  |
|               | TRCN123097 | GCACAGCAAAGCCAGATACTT   |
|               | TRCN123098 | ACCCGATAGATGTCAAGATTT   |

**Supplementary Table 6. Target sequences of shRNA (continued)**

| Gene                              | Clone ID   | Target sequence (5'-3') |
|-----------------------------------|------------|-------------------------|
| <i>GPR126</i>                     | TRCN11562  | CCTATCTTACATCCAAATCTA   |
|                                   | TRCN273811 | ACTTAACCTCAGCCAATATTA   |
|                                   | TRCN273865 | CCTATCTTACATCCAAATCTA   |
| <i>IL6R</i>                       | TRCN372671 | ATGCATCCGCCGTACTCTTTG   |
|                                   | TRCN372728 | CTGGACCCTGTGGATGATAAA   |
|                                   | TRCN378748 | TATCGGGCTGAACGGTCAAAG   |
| <i>OSBPL8</i>                     | TRCN281229 | GTGACACAGATACATCAGAAA   |
| <i>RAB8B</i>                      | TRCN379718 | ACCTGTTGCAGAAGCGGTTAT   |
|                                   | TRCN380132 | TACTGCCTTGGTAGCATTTA    |
|                                   | TRCN380248 | GTCGTGAAGTTCTAGACAAAT   |
|                                   | TRCN380390 | AGAAGCTAGCAATTGACTATG   |
|                                   | TRCN382238 | GAATGATCCTGGGTAACAAAT   |
| <i>RFTN1</i>                      | TRCN130134 | CGACTCTTCTGCTTTGACAAA   |
|                                   | TRCN130387 | GCGATTCTCCAGAGAAGAAAT   |
|                                   | TRCN130642 | CCAGAAACTCATCCCAGAGTT   |
| <i>RHOF</i>                       | TRCN48050  | CAACGTCCTCATCAAGTGGTT   |
|                                   | TRCN48051  | GTCATCTGCTATGACGTCAT    |
| <i>MCT2</i><br>( <i>SLC16A7</i> ) | TRCN38508  | CCTTGAGCAAATCTAAACATT   |
|                                   | TRCN286881 | CCTTGAGCAAATCTAAACATT   |
|                                   | TRCN294347 | CAACCCGCCTTAACCATAATT   |
| <i>THBD</i>                       | TRCN53923  | GCCGATGTCATTTCCCTTGCTA  |
|                                   | TRCN53924  | CCAGTGGGTTACGGGAGACAA   |
|                                   | TRCN53925  | CTTGCTCATAGGCATCTCCAT   |
|                                   | TRCN53927  | CTTCCTCAATGCCAGTCAGAT   |
|                                   | TRCN174209 | GCTAGCTGTGAGTGCCCTGAA   |
| <i>IL-1<math>\beta</math></i>     | TRCN358600 | CTGACTTCACCATGCAATTTG   |
|                                   | TRCN358661 | TCACCTCTCCTACTCACTTAA   |
| <i>LCN2</i>                       | TRCN60290  | GTA CT TCAAGATCACCTCTA  |
|                                   | TRCN372769 | CAATTCTCAGAGAAGACAAAG   |

**Supplementary Table 7. Primer sequences for real-time PCR**

| Gene          |         | Sequence (5'-3')         |
|---------------|---------|--------------------------|
| <i>ABCG2</i>  | forward | CACAAGGAAACACCAATGGCT    |
|               | reverse | ACAGCTCCTTCAGTAAATGCCTTC |
| <i>AREG</i>   | forward | TGCTGGATTGGACCTCAATG     |
|               | reverse | TCCCGAGGACGGTTCCTACTAC   |
| <i>ARMCX1</i> | forward | CAACATCCTGGAGCGAACAA     |
|               | reverse | ACGTATGGCATTCTGGTTAAATGA |
| <i>ATP2B1</i> | forward | GAGCTGCGGGCTCTCATG       |
|               | reverse | TGGTGCAAATTCCATAGACATCTC |
| <i>ENPP1</i>  | forward | AGTGGCAACTTGCATTGAATCC   |
|               | reverse | CCAACAAAGAGGGCTTGCAT     |
| <i>FRAS1</i>  | forward | GGCAAATACACACCCCTAGTCTT  |
|               | reverse | GGGAGTGCTCACACATGAAATAG  |
| <i>FRMD5</i>  | forward | CAAGCCAAGTCCGCACAGT      |
|               | reverse | GCACTTGATTCCATGACTTCCTT  |
| <i>GPC6</i>   | forward | CAGGCTGACCTCGACACAGA     |
|               | reverse | GGTCCATGACCGACTCAATGT    |
| <i>GPR126</i> | forward | ACCTGGGGACCCTCTGTCAAGATG |
|               | reverse | AGCCATTCTGCCACCTTGCTCTG  |
| <i>IL6R</i>   | forward | ATGCGACAAGCCTCCCAGTGC    |
|               | reverse | GCAATGCAGAGGAGCGTTCCGA   |
| <i>OSBPL8</i> | forward | GAAGGTGCTGGATGGATGCT     |
|               | reverse | GAAACGCTCAGGTCATGTTCCCT  |
| <i>RAB8B</i>  | forward | CAGGAGCAGGTGGACCAGTGA    |
|               | reverse | TGAGGCTGGGTGACCTGTGCT    |
| <i>RFTN1</i>  | forward | AACGCACGTGGGGATCACGC     |
|               | reverse | GGGTGAGCTGGGCTGCTTGG     |
| <i>RHOF</i>   | forward | CCGGGCAGGAAGGAGCTGAAGA   |
|               | reverse | CCTTGCTGCCAACGGTCACG     |
| <i>MCT2</i>   | forward | TGGCCCAGTTCTTCTTGGCCC    |
|               | reverse | GCCACACGCTTGCTGCTACC     |
| <i>THBD</i>   | forward | ACCGGTGCGAGGACGTGGAT     |
|               | reverse | CTGAAGCACGGGTCCACGGG     |

**Supplementary Table 7. Primer sequences for real-time PCR (continued)**

| Gene                          |         | Sequence (5'-3')       |
|-------------------------------|---------|------------------------|
| <i>GAPDH</i>                  | forward | ACCCAGAAGACTGTGGATGG   |
|                               | reverse | TCTAGACGGCAGGTCAGGTC   |
| <i>IL-1<math>\beta</math></i> | forward | GCTGCTCTGGGATTCTCTTCA  |
|                               | reverse | GGCCATCAGCTTCAAAGAACA  |
| <i>LCN2</i>                   | forward | GAGTTACCTCGTCCGAGTGG   |
|                               | reverse | TTGGTTCTCCCGTAGAGGGT   |
| <i>OLR1</i>                   | forward | ACTGGGAAAAGAGCCAAGAGAA |
|                               | reverse | TGGATGAAGTCCAGATCAGC   |



**Supplementary Table 8. Primer sequences for Chromatin immunoprecipitation (ChIP)**

| Promoter Region                            |         | Sequence (5'-3')     |
|--------------------------------------------|---------|----------------------|
| <i>IL-1<math>\beta</math></i> (-100~+1)    | forward | AACTTGCCAGGTGTTTCAGG |
|                                            | reverse | GGCCATCAGCTTCAAAGAAC |
| <i>IL-1<math>\beta</math></i> (-200~-100)  | forward | GGGAGAGGGAGAGCTCAGAT |
|                                            | reverse | TCTCAAAGCTGCCTGAAACA |
| <i>IL-1<math>\beta</math></i> (-400~-200)  | forward | TACAAGTCCCTCCAGCCTTG |
|                                            | reverse | GCTCCCTGTTGGATCTTGAG |
| <i>IL-1<math>\beta</math></i> (-600~-400)  | forward | GAGCTCGCCAGTGAAATGAT |
|                                            | reverse | CCTTGCAACAACACATCTGG |
| <i>IL-1<math>\beta</math></i> (-800~-600)  | forward | TCTGCTCCAGCTCTCCTAGC |
|                                            | reverse | GGCGAGCTCAGGTACTTCTG |
| <i>IL-1<math>\beta</math></i> (-1000~-800) | forward | TCTCCCTCTCCTTCCCTCTC |
|                                            | reverse | TTGCTAAACCAAACCCCAAC |
| <i>LCN2</i> (-100~+1)                      | forward | TGCAGAAATCTTGCCAAGTG |
|                                            | reverse | ATTCAGGGCCGAGGAAG    |
| <i>LCN2</i> (-200~-100)                    | forward | AAGGAAGGCACAGAGGGAGT |
|                                            | reverse | GGGATCTAGGGTGGGTTGAT |
| <i>LCN2</i> (-400~-200)                    | forward | ACCCTTCCCTGACCCTTAAA |
|                                            | reverse | ACTCCCTCTGTGCCTTCCTT |
| <i>LCN2</i> (-600~-400)                    | forward | GCACTCACAGGAGAGGAAGG |
|                                            | reverse | TCATGTGCTGTTTCCTGGTT |
| <i>LCN2</i> (-800~-600)                    | forward | TCAGTGACCCAAAGCAACAG |
|                                            | reverse | CCTTCCTCTCCTGTGAGTGC |
| <i>LCN2</i> (-1000~-800)                   | forward | CTCATGGGTGAGCCATCTCT |
|                                            | reverse | AGTGCAAGGATCTGGCCTTA |
